# Supplementary material
Source: PubMed Central journal article supplement (PMC6939608)
Supplement: NIHMS1061780-supplement-S_Figures.pdf [file NIHMS1061780-supplement-S_Figures.pdf]

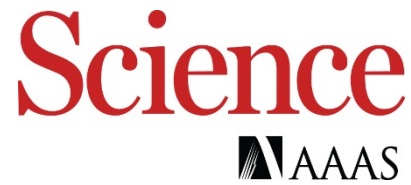

## Supplementary Materials for

### **Conditioning of naïve CD8<sup>+</sup> T cells for tissue-resident memory formation**

Vinidhra Mani, Shannon K. Bromley, Tarmo Äijö, Rut Mora-Buch, Esteban Carrizosa, Ross D. Warner, Moustafa Hamze, Debattama R. Sen, Alexandra Y. Chasse, Alina Lorant, Jason W. Griffith, Rod A. Rahimi, Craig P. McEntee, Kate L. Jeffrey, Francesco Marangoni, Mark H. Travis, Adam Lacy-Hulbert, Andrew D. Luster, and Thorsten R. Mempel.

Correspondence to: [tmempel@mgh.harvard.edu](mailto:tmempel@mgh.harvard.edu)

#### **This PDF file includes:**

Figs. S1 to S6

Table S2

#### **Other Supplementary Material for this manuscript includes the following:**

Table S1 (as \*.txt-file)

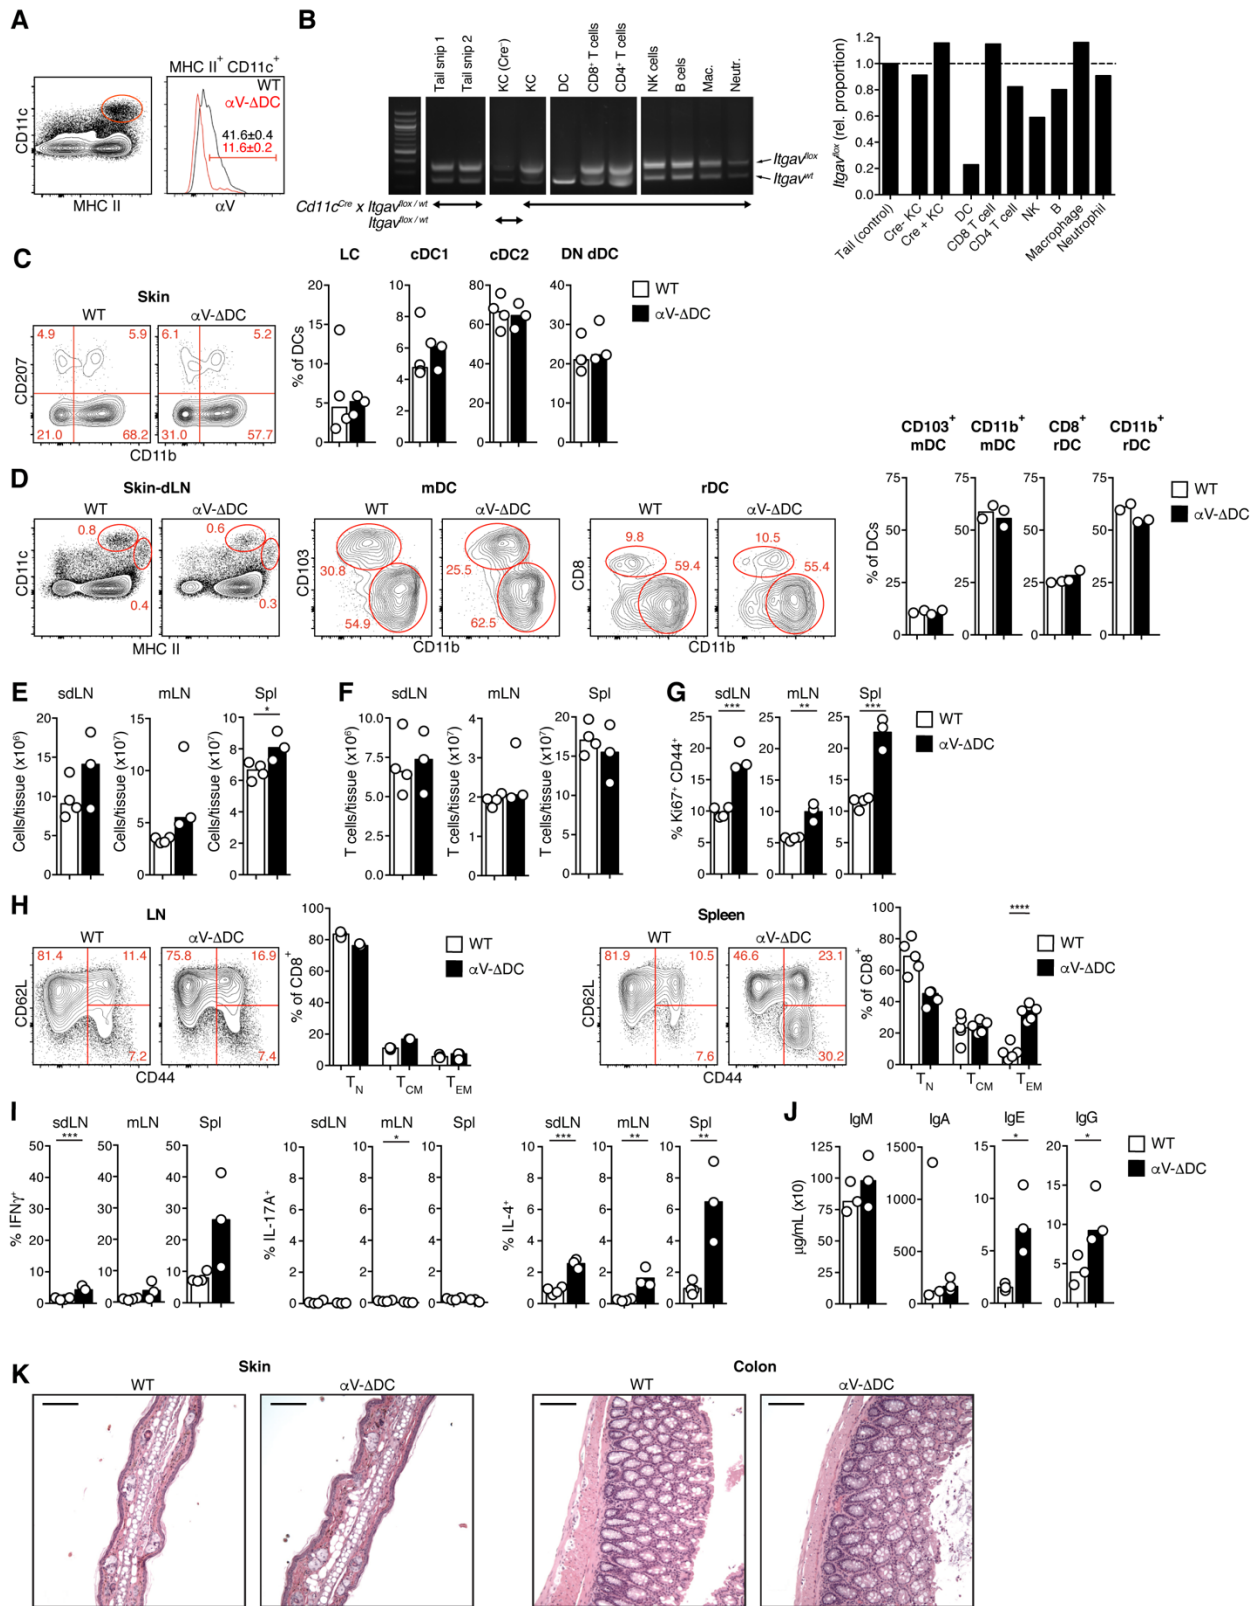

**Fig. S1. (A)**  $\alpha V$  protein cell surface expression in splenic  $CD11c^+$   $MHC\ II^+$  DC from  $\alpha V$ -ADC or littermate control WT mice. Numbers indicate Means $\pm$ SEM (n=3/group) **(B)** PCR analysis of

floxed (400-bp product) and WT (150-bp product) *Itgav* alleles in tail snip samples, keratinocytes (KC) and various immune cells of *Cd11c<sup>Cre</sup> × Itgav<sup>fl/wt</sup>* or *(Cre<sup>-</sup>) Itgav<sup>fl/wt</sup>* mice control. Quantification (right) of proportion of floxed alleles in *Cd11c<sup>Cre</sup> × Itgav<sup>fl/wt</sup>* normalized to proportion in *Itgav<sup>fl/w</sup>* mice. Data are representative of three independent experiments. **(C)** Frequency of CD11c<sup>+</sup> MHC II<sup>+</sup>, CD11b<sup>+</sup> CD207<sup>+</sup> Langerhans cells, dermal CD11b<sup>-</sup> CD207<sup>+</sup> cDC1, CD11b<sup>+</sup> CD207<sup>-</sup> cDC2, and CD11b<sup>-</sup> CD207<sup>-</sup> DN dDC in skin of  $\alpha$ V- $\Delta$ DC or WT mice. Data are representative of four independent experiments. **(D)** Frequency of CD11c<sup>hi</sup> MHC II<sup>int</sup> resident DC (rDC), CD11c<sup>int</sup> MHC II<sup>hi</sup> migratory DC (mDC), as well as their CD11b<sup>+</sup> and CD8<sup>+</sup> or CD103<sup>+</sup> subsets in LNs of  $\alpha$ V- $\Delta$ DC or WT mice. Data are means and replicates and representative of three independent experiments. **(E-G)** Total cell counts (E), T cell counts (F), and frequency of Ki67<sup>+</sup> CD44<sup>+</sup> CD4<sup>+</sup> T cells (G) in skin-draining LNs (sdLNs), mesenteric LNs (mLNs), and spleens (Spl) of 7 week-old  $\alpha$ V- $\Delta$ DC or WT mice. Data are means and replicates and representative of two independent experiments. **(H)** Frequencies of CD44<sup>lo/int</sup> naive, CD44<sup>hi</sup> CD62L<sup>hi</sup> central memory, and CD44<sup>hi</sup> CD62L<sup>lo</sup> effector/effector memory phenotype CD8<sup>+</sup> T cells in spleens and LNs of 10 week-old  $\alpha$ V- $\Delta$ DC or WT mice. Data are means and replicates and representative of six independent experiments. **(I-K)** Ex vivo-stimulated expression of indicated cytokines in CD4<sup>+</sup> T cells from indicated tissues (I), serum concentrations of indicated immunoglobulins (J), and histological appearance of ear skin and colon tissue of 7 week-old  $\alpha$ V- $\Delta$ DC or WT mice. Data are means and replicates and representative of two independent experiments. Scale bars = 100  $\mu$ m. \*/\*\*/\*\*\*/\*\*\*\*: p<0.05/0.01/0.001/0.0001 (Two-tailed unpaired Student's *t*-tests in (C-J)).

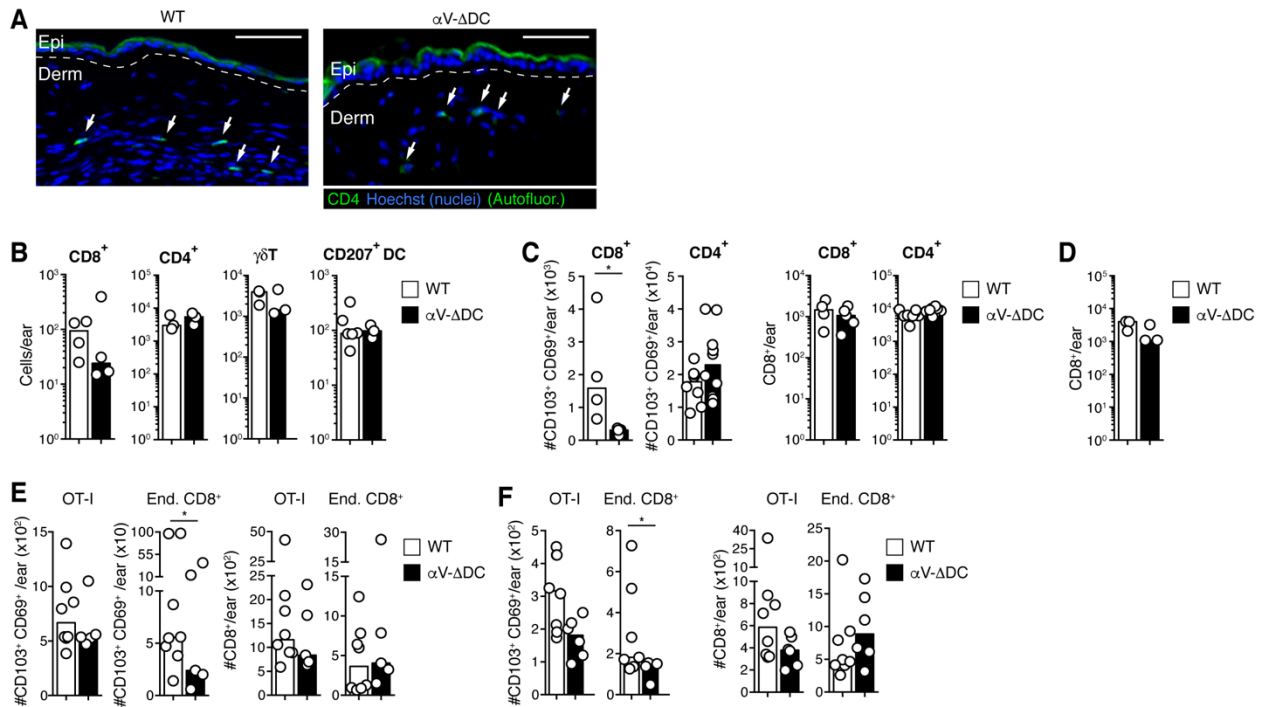

**Fig. S2. (A)** Histological cross-sections from ear skin of  $\alpha V-\Delta DC$  and WT littermate control mice. Arrows indicate CD4<sup>+</sup> T<sub>RM</sub> cells in the dermis of both WT and  $\alpha V-\Delta DC$  mice. Dashed lines indicate dermal-epidermal border. Data are representative of three independent experiments. Scale bars = 50  $\mu m$ . Epi: epithelium, Derm: dermis. **(B)** Absolute numbers of indicated immune cell subsets in ears of  $\alpha V-\Delta DC$  and WT mice. Data are means and replicates and representative of two independent experiments. **(C)** Absolute numbers of CD103<sup>+</sup> CD69<sup>+</sup> (left) and of total (right) CD4<sup>+</sup> and CD8<sup>+</sup> T cells in skin 4 weeks after sterile inflammation induced by mechanical irritation with a tattooing device. Data are means and replicates and representative of five independent experiments. **(D)** Absolute numbers of CD8<sup>+</sup> T cells in skin 4 weeks after topical DNFB treatment. Data are means and replicates and representative of three independent experiments. **(E-F)** Absolute numbers in skin of CD103<sup>+</sup> CD69<sup>+</sup> (left) and of total (right) CD8<sup>+</sup> T cells derived from OT-I or from polyclonal endogenous cells 4 weeks after adoptive i.v. transfer of activated OT-I cells and sterile inflammation induced by mechanical irritation with a tattooing device (E) or 4 weeks following OVA DNA vaccination after adoptive transfer of naive OT-I cells (F). Numbers above graphs indicate fold reduction in T cell numbers. Data in (E) and (F) are means and replicates and representative of six independent experiments. \*:  $p < 0.05$  (Two-tailed unpaired Student's *t*-tests in (B-F)).

A

DARs ↑ in WT

| Motif | Motif name                                             | p-value  | q-value<br>(Benjamini) | % of target<br>sequences<br>with motif | % of background<br>sequences with motif |
|-------|--------------------------------------------------------|----------|------------------------|----------------------------------------|-----------------------------------------|
|       | Klf4(Zf)/mES-Klf4-ChIP-Seq(GSE11431)/Homer             | 1.00E-21 | 0                      | 31.20%                                 | 15.68%                                  |
|       | KLF3(Zf)/MEF-Klf3-ChIP-Seq(GSE44748)/Homer             | 1.00E-21 | 0                      | 42.40%                                 | 24.77%                                  |
|       | Klf9(Zf)/GBM-Klf9-ChIP-Seq(GSE62211)/Homer             | 1.00E-17 | 0                      | 35.52%                                 | 20.63%                                  |
|       | RUNX1(Runt)/Jurkat-RUNX1-ChIP-Seq(GSE29180)/Homer      | 1.00E-16 | 0                      | 36.16%                                 | 21.31%                                  |
|       | RUNX2(Runt)/PCa-RUNX2-ChIP-Seq(GSE33889)/Homer         | 1.00E-16 | 0                      | 31.04%                                 | 17.15%                                  |
|       | RUNX(Runt)/HPC7-Runx1-ChIP-Seq(GSE22178)/Homer         | 1.00E-16 | 0                      | 28.80%                                 | 15.57%                                  |
|       | RUNX-AML(Runt)/CD4+PolII-ChIP-Seq(Barski_et_al.)/Homer | 1.00E-14 | 0                      | 27.52%                                 | 15.11%                                  |
|       | Sp1(Zf)/Promoter/Homer                                 | 1.00E-13 | 0                      | 34.40%                                 | 21.08%                                  |
|       | Sp5(Zf)/mES-Sp5.Flag-ChIP-Seq(GSE72989)/Homer          | 1.00E-10 | 0                      | 56.80%                                 | 43.39%                                  |
|       | KLF10(Zf)/HEK293-KLF10.GFP-ChIP-Seq(GSE58341)/Homer    | 1.00E-10 | 0                      | 32.48%                                 | 21.18%                                  |
|       | ETV1(ETS)/GIST48-ETV1-ChIP-Seq(GSE22441)/Homer         | 1.00E-09 | 0                      | 50.56%                                 | 38.11%                                  |
|       | KLF5(Zf)/LoVo-KLF5-ChIP-Seq(GSE49402)/Homer            | 1.00E-09 | 0                      | 59.84%                                 | 47.33%                                  |
|       | GABPA(ETS)/Jurkat-GABPa-ChIP-Seq(GSE17954)/Homer       | 1.00E-09 | 0                      | 39.04%                                 | 27.78%                                  |
|       | KLF6(Zf)/PDAC-KLF6-ChIP-Seq(GSE64557)/Homer            | 1.00E-08 | 0                      | 53.44%                                 | 41.58%                                  |
|       | Etv2(ETS)/ES-ER71-ChIP-Seq(GSE59402)/Homer(0.967)      | 1.00E-08 | 0                      | 36.16%                                 | 25.40%                                  |
|       | EHF(ETS)/LoVo-EHF-ChIP-Seq(GSE49402)/Homer             | 1.00E-08 | 0                      | 43.84%                                 | 32.61%                                  |
|       | EKLF(Zf)/Erythrocyte-Klf1-ChIP-Seq(GSE20478)/Homer     | 1.00E-08 | 0                      | 12.48%                                 | 6.15%                                   |
|       | ERG(ETS)/VCaP-ERG-ChIP-Seq(GSE14097)/Homer             | 1.00E-07 | 0                      | 50.88%                                 | 40.22%                                  |
|       | Tcf4(HMG)/Hct116-Tcf4-ChIP-Seq(SRA012054)/Homer        | 1.00E-07 | 0                      | 15.68%                                 | 9.08%                                   |
|       | ELF3(ETS)/PDAC-ELF3-ChIP-Seq(GSE64557)/Homer           | 1.00E-06 | 0                      | 26.40%                                 | 18.02%                                  |

B

DARs ↑ in αV-ADC

|  |                                                          |          |   |        |        |
|--|----------------------------------------------------------|----------|---|--------|--------|
|  | IRF2(IRF)/Erythroblasts-IRF2-ChIP-Seq(GSE36985)/Homer    | 1.00E-33 | 0 | 16.17% | 2.61%  |
|  | ISRE(IRF)/ThioMac-LPS-Expression(GSE23622)/Homer         | 1.00E-31 | 0 | 12.47% | 1.50%  |
|  | IRF1(IRF)/PBMC-IRF1-ChIP-Seq(GSE43036)/Homer             | 1.00E-25 | 0 | 16.63% | 3.66%  |
|  | IRF8(IRF)/BMDM-IRF8-ChIP-Seq(GSE77884)/Homer             | 1.00E-23 | 0 | 25.17% | 8.71%  |
|  | IRF3(IRF)/BMDM-Irf3-ChIP-Seq(GSE67343)/Homer             | 1.00E-18 | 0 | 23.33% | 9.03%  |
|  | PU.1:IRF8(ETS:IRF)/pDC-Irf8-ChIP-Seq(GSE66899)/Homer     | 1.00E-15 | 0 | 16.63% | 5.53%  |
|  | Tbet(T-box)/CD8-Tbet-ChIP-Seq(GSE33802)/Homer            | 1.00E-13 | 0 | 50.81% | 33.22% |
|  | bZIP:IRF(bZIP,IRF)/Th17-BatF-ChIP-Seq(GSE39756)/Homer    | 1.00E-11 | 0 | 25.87% | 13.39% |
|  | IRF4(IRF)/GM12878-IRF4-ChIP-Seq(GSE32465)/Homer          | 1.00E-11 | 0 | 24.48% | 12.36% |
|  | ETS1(ETS)/Jurkat-ETS1-ChIP-Seq(GSE17954)/Homer           | 1.00E-09 | 0 | 42.03% | 28.39% |
|  | ETS:RUNX(ETS,Runt)/Jurkat-RUNX1-ChIP-Seq(GSE17954)/Homer | 1.00E-08 | 0 | 7.16%  | 2.08%  |
|  | Tbr1(T-box)/Cortex-Tbr1-ChIP-Seq(GSE71384)/Homer         | 1.00E-08 | 0 | 53.35% | 39.80% |
|  | PRDM1(Zf)/Hela-PRDM1-ChIP-Seq(GSE31477)/Homer            | 1.00E-07 | 0 | 26.33% | 15.97% |
|  | Tcf4(HMG)/Hct116-Tcf4-ChIP-Seq(SRA012054)/Homer          | 1.00E-07 | 0 | 24.25% | 14.37% |
|  | GABPA(ETS)/Jurkat-GABPa-ChIP-Seq(GSE17954)/Homer         | 1.00E-07 | 0 | 35.57% | 24.27% |
|  | Tbx5(T-box)/HL1-Tbx5.biotin-ChIP-Seq(GSE21529)/Homer     | 1.00E-06 | 0 | 82.91% | 72.27% |
|  | Eomes(T-box)/H9-Eomes-ChIP-Seq(GSE26097)/Homer           | 1.00E-06 | 0 | 68.13% | 56.24% |
|  | Tcf3(HMG)/mES-Tcf3-ChIP-Seq(GSE11724)/Homer              | 1.00E-06 | 0 | 15.24% | 8.06%  |
|  | ETV1(ETS)/GIST48-ETV1-ChIP-Seq(GSE22441)/Homer           | 1.00E-06 | 0 | 47.81% | 36.39% |
|  | RUNX1(Runt)/Jurkat-RUNX1-ChIP-Seq(GSE29180)/Homer        | 1.00E-05 | 0 | 41.34% | 30.45% |

**Fig. S3.** Transcription factor motifs enriched in DARs found in naive CD8<sup>+</sup> T cells from WT mice (A) and  $\alpha$ V- $\Delta$ DC mice (B). Motif are ranked based on statistical significance of their enrichment. KLF and Runt motifs are highlighted in bold font in (A), whereas IRF and T-box motives are highlighted in (B). Data representative of two animals/group.

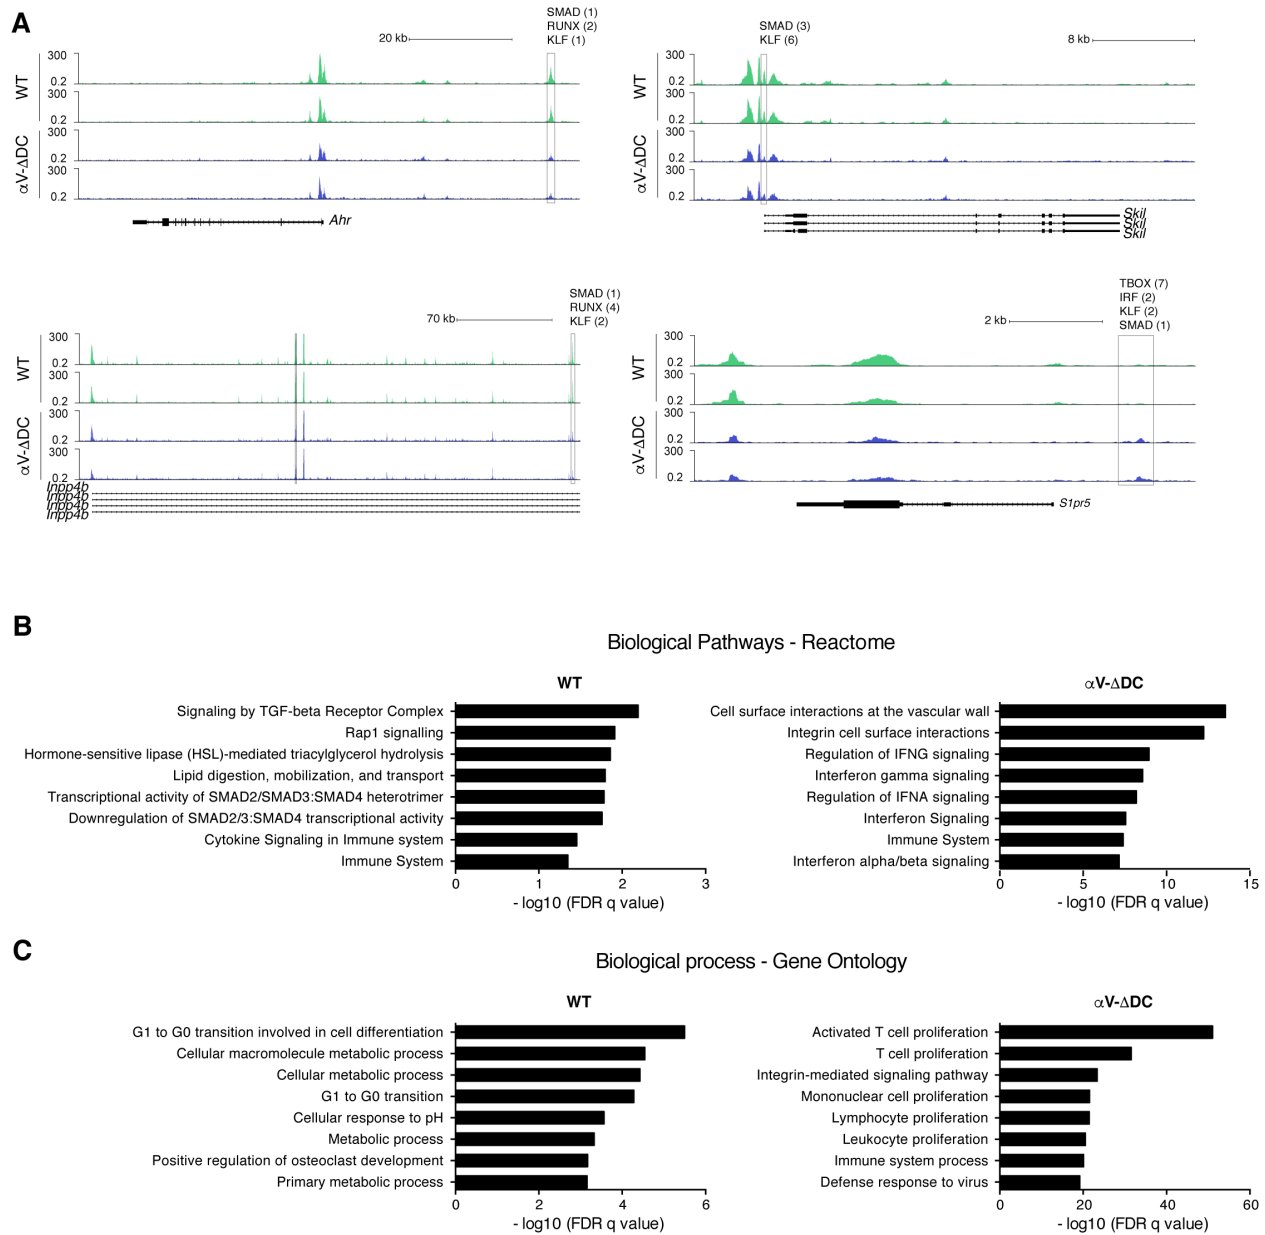

**Fig. S4. (A)** Normalized chromatin accessibility near the *Ahr* and *Skil* (top), and the *Inpp4b* and *Slpr5* loci (bottom). Rectangles mark detected DARs. Transcription factor motifs and their number of occurrences (in parentheses) in the respective DAR are indicated above. **(B, C)** GREAT analysis of DARs in cells from WT and αV-ΔDC mice. Top 8 enrichment hits each from the MSigDB Reactome database (B) and the Gene Ontology (GO) Biological Process database (C), ranked by FDR q-value and plotted as  $-\log_{10}(\text{FDR}q)$ . Data are representative of two animals/group.

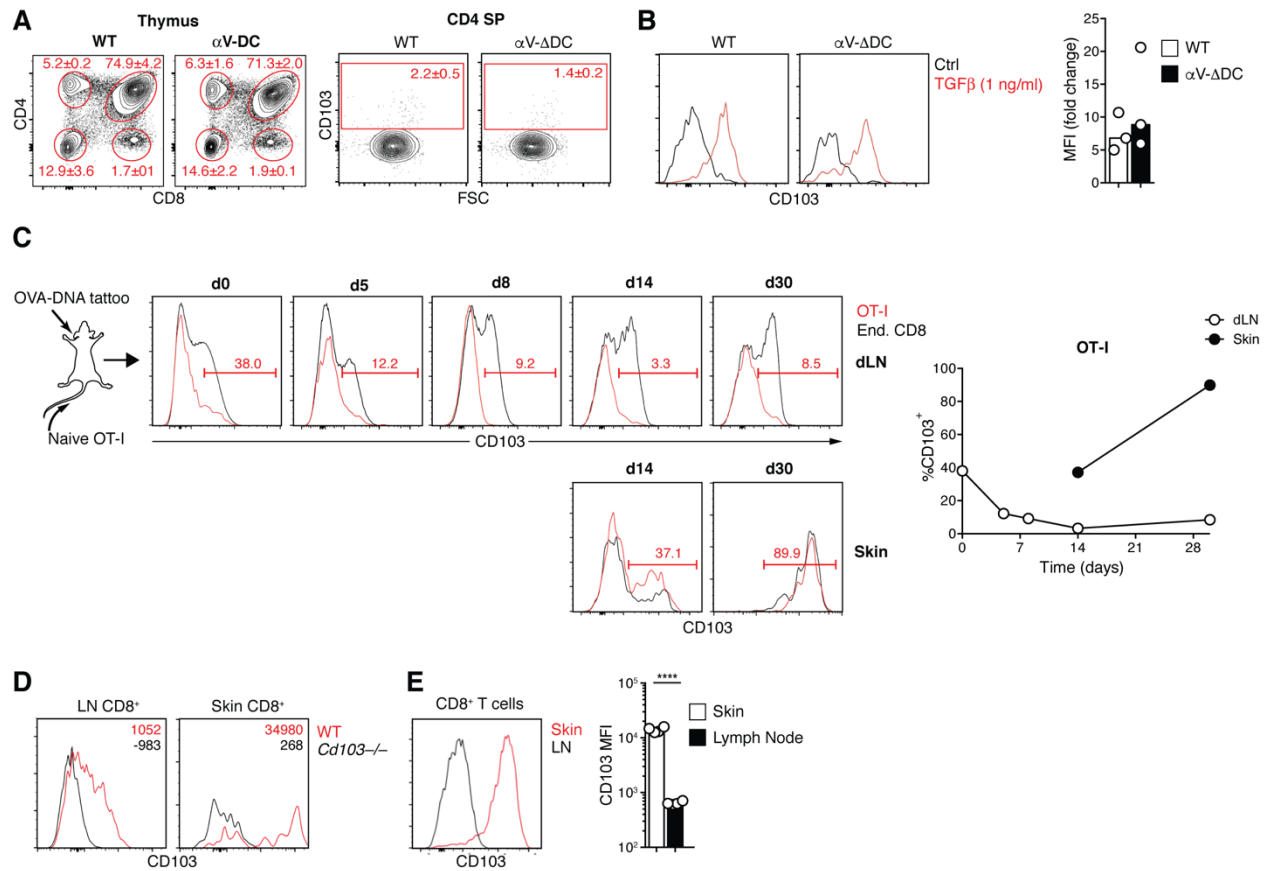

**Fig. S5. (A)** Frequencies of CD4 SP, CD8 SP, DN and DP thymocytes and CD013 expression on CD4 SP thymocytes in  $\alpha V-\Delta DC$  or littermate control WT mice. Numbers by gates indicate mean  $\pm$  SEM of frequencies. Data are representative of four independent experiments. **(B)** CD103 expression of naive CD8<sup>+</sup> T cells from  $\alpha V-\Delta DC$  or WT mice following 3 days of culture in 100 ng/mL of IL-15 and 5 ng/mL of IL-7 in the presence or absence of 1 ng/ml of activated TGF- $\beta$ 1. Graph shows fold change of MFI in response to TGF- $\beta$ 1. Data are means and replicates and representative of three independent experiments. **(C)** Naïve OT-I were adoptively transferred into WT mice, which were vaccinated with OVA-plasmid DNA delivered through tattoo of the ear skin. CD103 expression on OT-I cells was assayed in individual mice at indicated time-points after vaccination in the draining cervical LN (top row) and ear skin (bottom row). Endogenous CD8<sup>+</sup> T cell at each site are shown for reference. Data are representative of two independent experiments. **(D)** CD103 expression on naive and skin CD8<sup>+</sup> T cells in C57BL/6 mice, shown in direct comparison to cells from CD103-deficient mice. Data are representative of two animals/group. **(E)** CD103 expression on naive CD8<sup>+</sup> T cells in sdLNs and on total CD8<sup>+</sup> T cells in skin, 4 weeks following local DNFB challenge. Data are means and replicates and representative of six independent experiments. \*\*\*\*:  $p < 0.0001$  (Two-tailed unpaired Student's  $t$ -tests in (B), (E)).



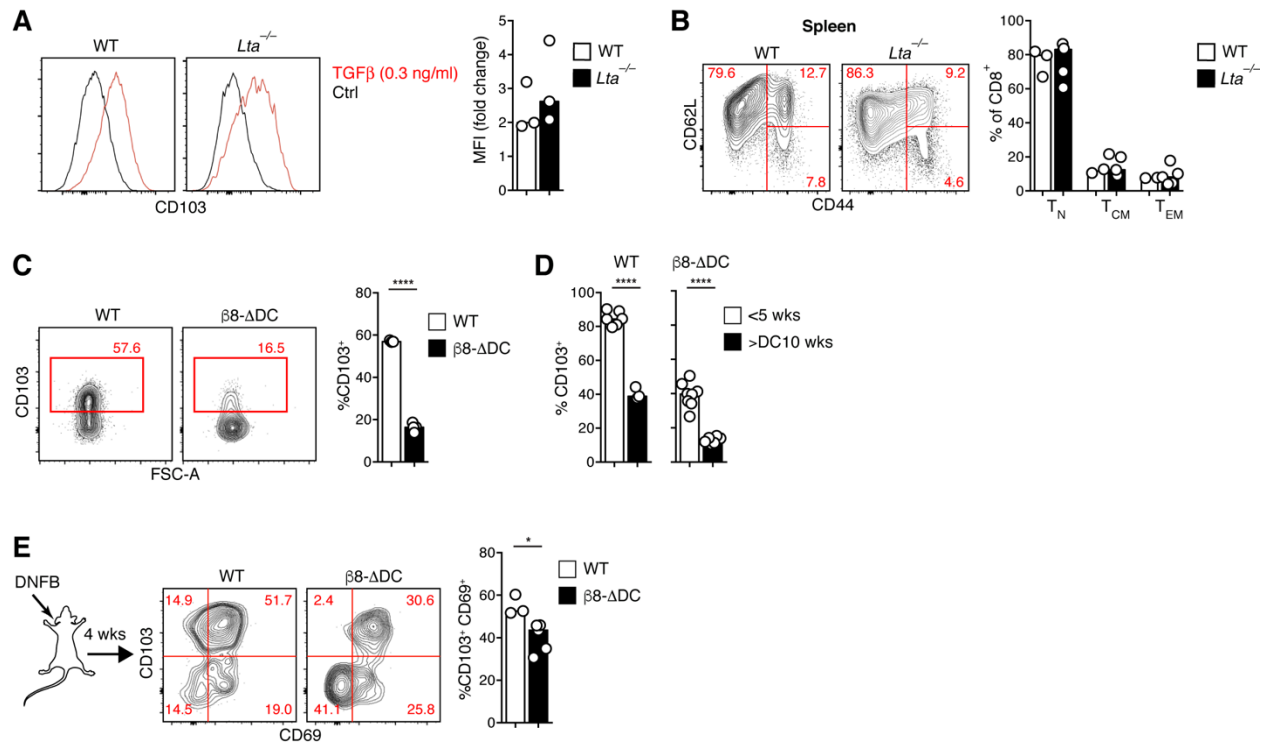

**Fig. S6. (A)** CD103 expression of naïve CD8<sup>+</sup> T cells from *Lta*<sup>-/-</sup> or WT mice following 3 days of culture in IL-7 and IL-15 in the presence or absence of 0.3 ng/ml of activated TGF-β1. WT CD8<sup>+</sup> T cells lose CD103 expression during 3 days of culture in IL-7 in absence of TGF-β, resulting in similar baseline expression as in LTα KO cells. Graph shows fold change of MFI in response to TGF-β1. Data are medians and replicates and representative of two independent experiments. **(B)** Frequencies of CD44<sup>lo/int</sup> naïve, CD44<sup>hi</sup> CD62L<sup>hi</sup> central memory, and CD44<sup>hi</sup> CD62L<sup>lo</sup> effector/effector memory phenotype CD8<sup>+</sup> T cells in spleens of *Lta*<sup>-/-</sup> or WT mice. Data are means and replicates and representative of three independent experiments. **(C-E)** Frequency of CD103<sup>+</sup> cells among naïve CD8<sup>+</sup> T cells in LNs (C), among naïve CD8<sup>+</sup> T cells in peripheral blood of very young (<5 wks) and older (>10 wks) mice (D), and of CD103<sup>+</sup> CD69<sup>+</sup> eT<sub>RM</sub> cells among total CD8<sup>+</sup> T cells in skin 4 week following DNFB challenge (E) in WT and β8-ADC mice. Data are means (C-D) or medians (E) and replicates and in each case representative of two independent experiments. \*/\*\*\*\*: p<0.05/0.0001 (Mann–Whitney *U* test in (A and E) and two-tailed unpaired Student’s *t*-tests in (B-D)).

**Antibodies for flow cytometry**

| Antigen      | Clone       | Vendor         | Formats                          | Conc. (µg/mL) |
|--------------|-------------|----------------|----------------------------------|---------------|
| B220         | RA3-6B2     | Biolegend      | FITC                             | 1.25          |
| CD103        | 2E7         | Biolegend      | APC, AF488, PacBlue, PerCP-Cy5.5 | 1             |
| CD11b        | M1/70       | Biolegend      | PE-Cy7, APC-Cy7                  | 1             |
| CD11c        | HL3         | BD Biosciences | PE-Cy7                           | 1             |
| CD19         | 6D5         | Biolegend      | BV421                            | 1             |
| CD207        | 4C7         | Biolegend      | APC                              | 1             |
| CD3          | 17A2        | Biolegend      | APC, FITC                        | 1             |
| CD4          | RM4-5       | Biolegend      | PacBlue, APC-Cy7, AF700          | 1             |
| CD44         | IM7         | Biolegend      | BV605, PerCP-Cy5.5, AF700        | 1             |
| CD45         | 30-F11      | Biolegend      | FITC, APC-Cy7, AF700             | 1.25          |
| CD45.1       | A20         | Biolegend      | FITC, PE-Cy7, BV605              | 1.25          |
| CD45.2       | 104         | Biolegend      | FITC, PacBlue                    | 2             |
| CD51         | RMV-7       | Biolegend      | PE                               | 2.5           |
| CD62L        | MEL-14      | Biolegend      | AF700, APC, APC-Cy7, BV421       | 1             |
| CD69         | H1.2F3      | Biolegend      | PE-Cy7, BV421, PE                | 1             |
| CD8 $\alpha$ | 5H10        | Thermo Fisher  | AF700, AF488, FITC               | 1.25          |
| CD8 $\beta$  | YTS156.7.7  | Biolegend      | PE, AF700, FITC, PE-Cy7          | 1             |
| F4/80        | BM8         | Biolegend      | PE                               | 1             |
| IA/IE        | M5/114.15.2 | Biolegend      | FITC, AF700, APC-Cy7             | 1             |
| Ly6G         | 1A8         | Biolegend      | BV605, FITC                      | 1             |
| NK1.1        | PK136       | Biolegend      | AF488                            | 1.25          |
| Thy1.1       | OX-7        | Biolegend      | AF700, PE-Cy7, PacBlue           | 0.5           |
| Thy1.2       | 30-H12      | Biolegend      | AF700, PacBlue, BV605, FITC      | 0.5           |
| (Viability)  | -           | Biolegend      | Zombie Yellow                    | unit "1 test" |
| (Viability)  | -           | eBioscience    | eFluor506                        | unit "1 test" |

**Antibodies for immunohistochemistry**

| Antigen        | Clone      | Vendor    | Formats | Conc. (µg/mL) |
|----------------|------------|-----------|---------|---------------|
| CD3            | 17A2       | Biolegend | Biotin  | 5             |
| CD4            | RM4-5      | Biolegend | AF647   | 2             |
| CD8 $\beta$    | YTS156.7.7 | Biolegend | PE      | 2             |
| (Streptavidin) | -          | Biolegend | AF647   | 2.5           |

**Table S2: Immunoreagents for flow cytometry and immunohistochemistry.** AF = Alexa Fluor, PacBlue = Pacific Blue
